# Supplementary material for: Beneficial regulation of vitamin D3-rich extract from the processing by-products of Penaeus sinensis on preosteoblastic MC3T3-E1 cells and improvement of bone health in VD-deficient mice
Source: Royal Society of Chemistry journal article supplement (doi:10.1039/d3fo00143a), 2023-01-01
Supplement: d3fo00143a1.pdf [file d3fo00143a1.pdf]

1 **Fig. S1** Changes of serum 25(OH)D, calcium (Ca) and phosphorus (P) levels in Balb/c mice after 11  
2 weeks of administration with TP 2235 vitamin D free diet compared to fed with normal rodent diet. (A)  
3 Serum 25(OH)D level of female and male mice, (B) serum Ca level of female and male mice, and (C)  
4 serum P level of female and male mice.

5 **Fig. S2** Serum 25 (OH) D level changes of VD-deficient mice after 3 weeks of oral administration with  
6 PPs-VD<sub>3</sub> or and VD<sub>3</sub> standard.

7
